# Supplementary material for: Mapping organic carbon vulnerable to mobile bottom fishing in currently unfished areas of the Norwegian continental margin
Source: Copernicus journal article supplement (doi:10.5194/bg-22-7611-2025), 2025-12-04
Supplement: Supplementary file 1 [file bg-22-7611-2025-supplement.pdf]

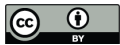

*Supplement of*

## **Mapping organic carbon vulnerable to mobile bottom fishing in currently unfished areas of the Norwegian continental margin**

**Markus Diesing et al.**

*Correspondence to:* Markus Diesing ([markus.diesing@ngu.no](mailto:markus.diesing@ngu.no))

The copyright of individual parts of the supplement might differ from the article licence.

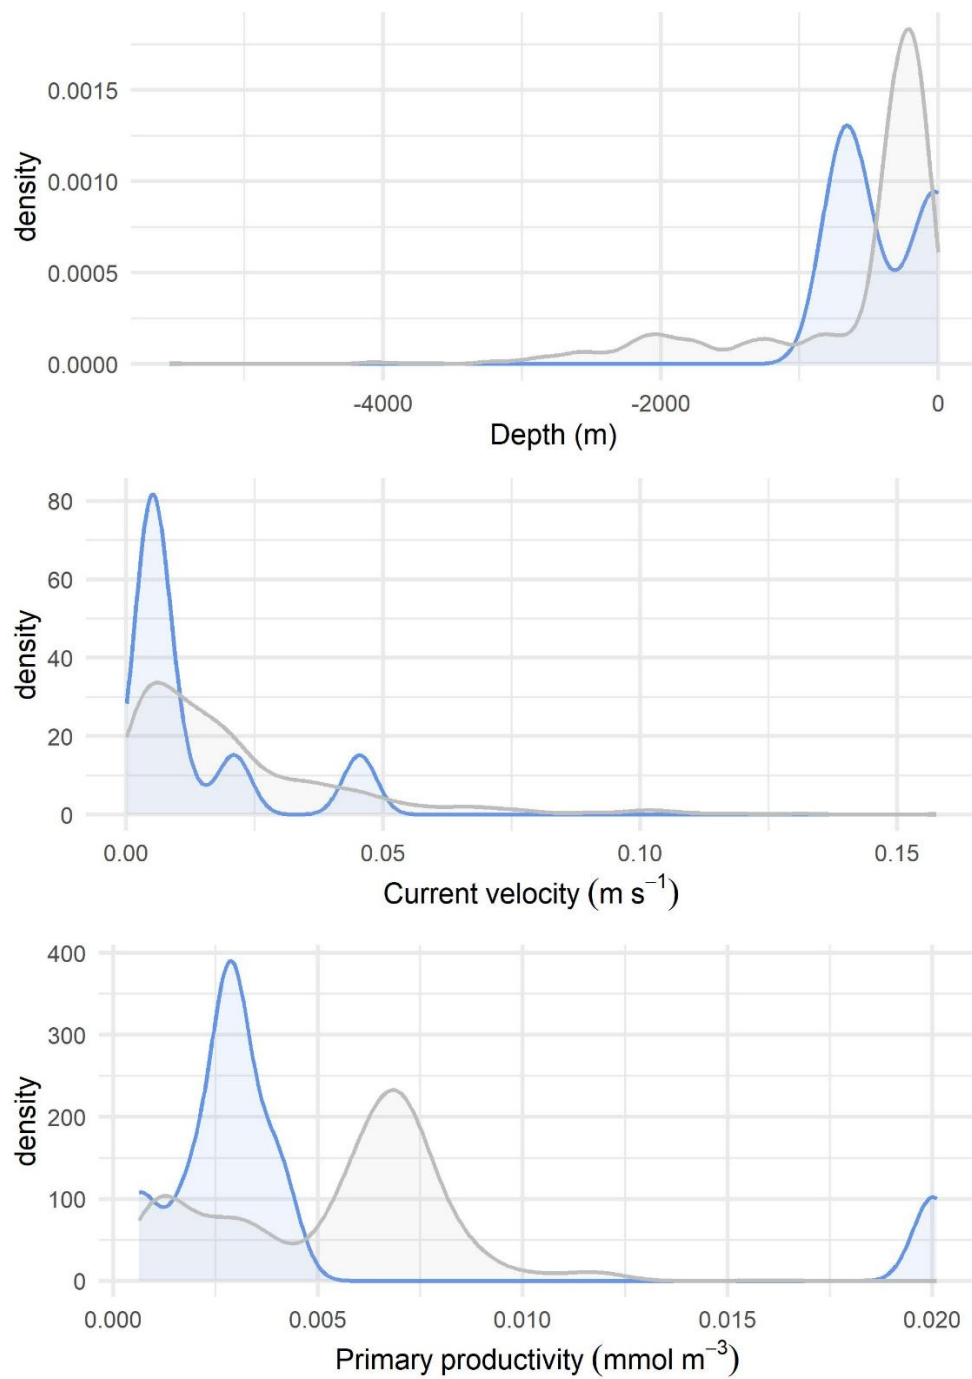

**Figure S1:** Comparison of the environmental conditions in the fishing impact studies (blue) and the unfished areas on the Norwegian continental margin (grey).

**Table S1:** Results of the sensitivity analysis when varying the values of the fraction of sediment that resettles to the seabed after resuspension between 0 and 1.

| <b>P<sub>crd</sub> (-)</b> | <b>Vulnerable organic carbon (Tg)</b> |                    |                    |
|----------------------------|---------------------------------------|--------------------|--------------------|
|                            | <b>Low impact</b>                     | <b>Mean impact</b> | <b>High impact</b> |
| 0                          | 9.2                                   | 36.4               | 60.6               |
| 0.25                       | 7.1                                   | 31.3               | 52.8               |
| 0.5                        | 5.0                                   | 26.2               | 45.0               |
| 0.75                       | 2.9                                   | 21.1               | 37.3               |
| <b>0.87</b>                | <b>1.9</b>                            | <b>18.7</b>        | <b>33.5</b>        |
| 1                          | 0.8                                   | 16.0               | 29.5               |
